# Supplementary material
Source: publisher figshare collection journal article supplement (https://acs.figshare.com/ndownloader/files/23743406)
Supplement: Supplementary file 1 [file 23743406]

## Supporting Information

Dr. E. Wiedenbeck, Prof. Dr. H. Cölfen

Physical Chemistry, University of Konstanz, Universitätsstr. 10, 78457 Konstanz, Germany, E-Mail: [helmut.coelfen@uni-konstanz.de](mailto:helmut.coelfen@uni-konstanz.de)

Prof. Dr. D. Gebauer

Leibniz University of Hannover, Callinstraße 9, 30167 Hannover, Germany, E-mail: [gebauer@acc.uni-hannover.de](mailto:gebauer@acc.uni-hannover.de)

## Potentiometric Titration Method for the Determination of Solubility Limits and $pK_a$ Values of Weak Organic Acids in Water

### Table of Contents

|             |           |             |          |            |               |              |
|-------------|-----------|-------------|----------|------------|---------------|--------------|
| Calculation | of        | free        | hydrogen | ion        | concentration |              |
| .....       |           |             |          |            |               | 2            |
| Derivation  | of        | equation    | for      | the        | determination | of           |
| .....       |           |             |          |            | crystallized  | compound     |
| .....       |           |             |          |            |               | 2            |
| Stop        | titration | experiments | of       | diclofenac | and           | flurbiprofen |
| .....       |           |             |          |            |               | 3            |
| References  |           |             |          |            |               |              |
| .....       |           |             |          |            |               |              |
| .....       |           |             |          |            |               | 4            |

### Calculation of free hydrogen ion concentration

The concentration of free hydrogen ions was determined from the pH with the following equation:

$$[H^+] = 10^{-pH} \quad (1)$$

### Derivation of equation for the determination of crystallized compound

When the dosing was stopped and the solution was in a supersaturated state with respect to the neutral, protonated compound, the constant pH<sub>1</sub> was recorded and converted with equation (1) to describe the ratio of neutral, protonated compound (AH) and anionic, deprotonated compound (A<sup>-</sup>) with the mass action law:

$$\frac{[H^+]_1}{K_a} = \frac{[AH]_1}{[A^-]_1} \quad (2)$$

After the addition of seed crystals and sufficient time for crystallization and pH equilibration, the recorded constant pH<sub>2</sub> was utilized to describe this ratio at dissolution equilibrium:

$$\frac{[H^+]_2}{K_a} = \frac{[AH]_2}{[A^-]_2} \quad (3)$$

If we want to combine those two stages with each other, following considerations are necessary: As AH precipitates from solution ( $n_{cryst}$ ) in the volume  $V_{tot}$  when seed crystals are present, the protonated compound concentration  $[AH]_1$  is lowered. Each crystallized compound molecule withdraws one proton from solution  $[H^+]_{ex}$  so the pH increases and lowers  $[AH]_1$  even further:

$$[AH]_2 = [AH]_1 - \frac{n_{cryst}}{V_{tot}} - [H^+]_{ex} \quad (4)$$

At the same time the rising pH value increases the concentration of  $[A^-]_1$  by the concentration  $[H^+]_{ex}$ :

$$[A^-]_2 = [A^-]_1 + [H^+]_{ex} \quad (5)$$

If we insert equations (4) and (5) into (3), we receive the following expression:

$$\frac{[H^+]_2}{K_a} = \frac{[AH]_1 - \frac{n_{cryst}}{V_{tot}} - [H^+]_{ex}}{[A^-]_1 + [H^+]_{ex}} \quad (6)$$

As the amount of protons withdrawn  $[H^+]_{ex}$  equals the amount of compound crystallized, we can write the following:

$$\frac{[H^+]_2}{K_a} = \frac{[AH]_1 - 2 \frac{n_{cryst}}{V_{tot}}}{[A^-]_1 + \frac{n_{cryst}}{V_{tot}}} \quad (7)$$

Rearrangement of the equation above yields the following equation for the calculation of the amount of crystallized compound in the volume:

$$\frac{n_{cryst}}{V_{tot}} = \frac{[AH]_1 - \frac{[H^+]_2}{K_a} [A^-]_1}{2 + \frac{[H^+]_2}{K_a}} \quad (8)$$

### Stop titration experiments of diclofenac and flurbiprofen

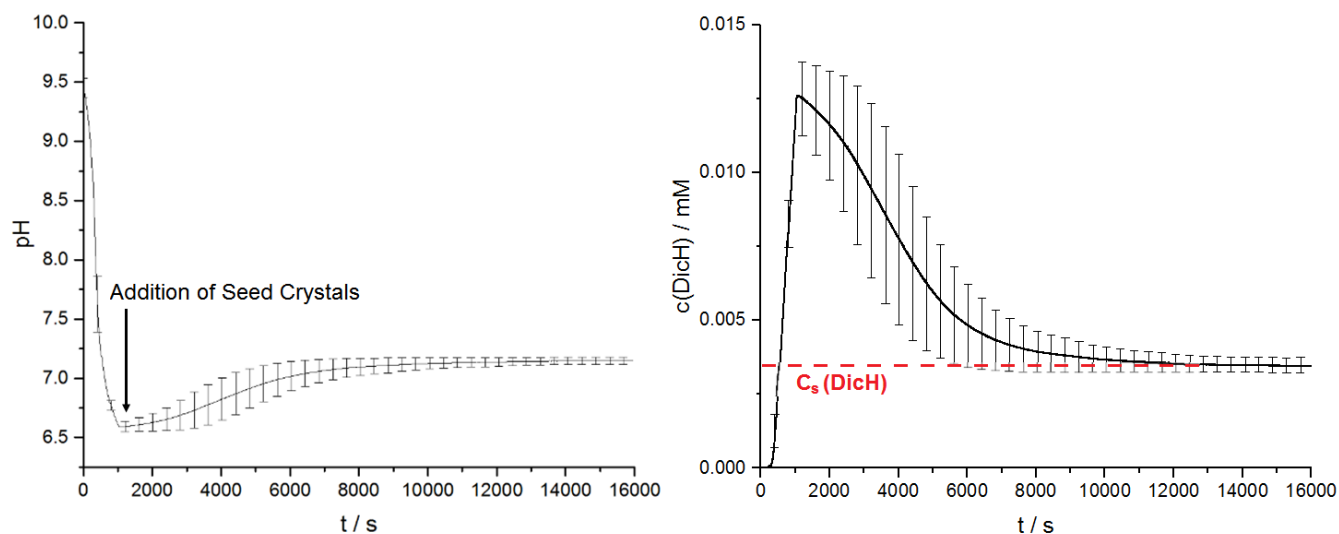

**Figure S1.** Stop titration experiments of 5 mM diclofenac sodium solution titrated with 8.0 mL of 10 mM diclofenac sodium solution and 1 mM HCl solution with subsequent addition of seed crystals (*HD2*). Left: pH equilibration of diclofenac after addition of the respective seed crystal powder. Right: Concentration of the neutral, protonated compound and intrinsic solubility limit of diclofenac (*HD2*) determined by equation (3) and a  $pK_a$  value of 3.99<sup>1</sup> with the initial total diclofenac concentration.

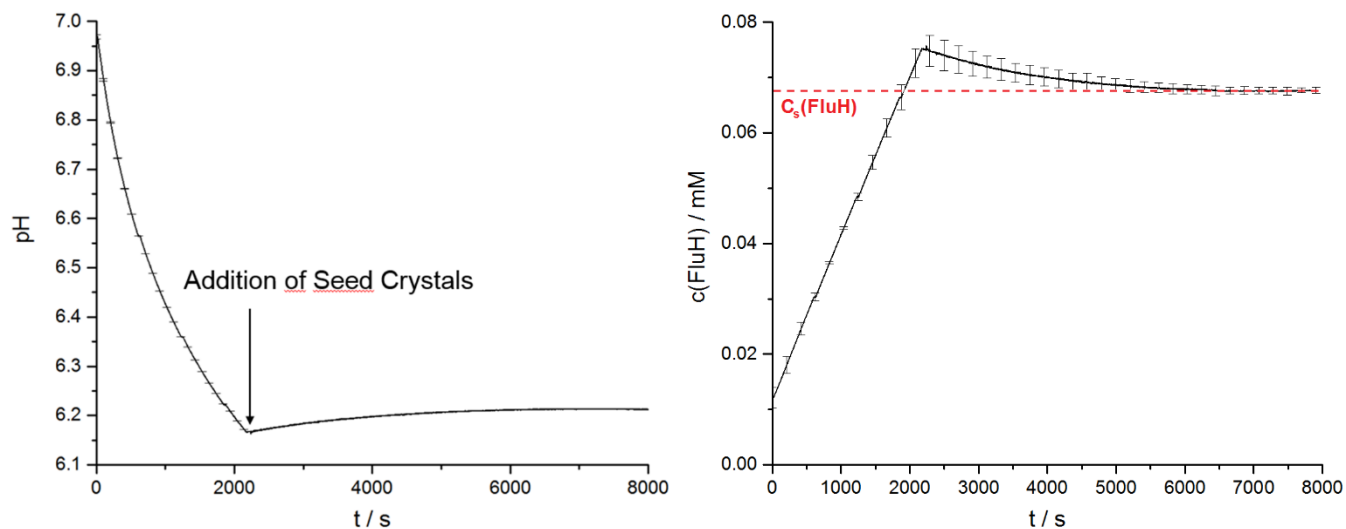

**Figure S2.** Stop titration experiments of 5 mM flurbiprofen sodium solution titrated with 7.0 mL of 10 mM flurbiprofen sodium solution and 1 mM HCl solution with subsequent addition of seed crystals. Left: pH equilibration of flurbiprofen after addition of the respective seed crystal powder. Right: Concentration of the neutral, protonated compound and intrinsic solubility limit of flurbiprofen determined by equation (3) and a  $pK_a$  value of 4.35<sup>2</sup> with the initial total flurbiprofen concentration.

## References

- (1) Avdeef, A.; Berger, C. M.; Brownell, C., *Pharm. Res.* **2000**, 17 (1), 85-89.
- (2) Ràfols, C.; Rosés, M.; Bosch, E., *Anal. Chim. Acta* **1997**, 338 (1), 127-134.
